# Supplementary material for: MicroRNA162 regulates stomatal conductance in response to low night temperature stress via abscisic acid signaling pathway in tomato
Source: Front Plant Sci. 2023 Mar 2;14:1045112. doi: 10.3389/fpls.2023.1045112 (PMC10019595; doi:10.3389/fpls.2023.1045112)
Supplement: Supplementary Table 1 — Overview of the high-throughput sequenced sRNA libraries. [file Table_1.xlsx]

## Sheet: TABLE S1
TABLE S1. Overview of the high-throughput sequenced sRNA libraries
Sample	Total Tags number	Filter having 'N' Tags	Filter low quality Tags	Adaptor3 insert null	5' adaptor contaminants	Length <16	Length >30	PloyA	Clean number	Uniq number
WC	32692422	95009	2405665	1	5	9156861	1133616	611021	19290244	2166713
WL	42582922	121984	3268488	1	10	9864558	2104232	761245	26462404	2000582
SC	27197059	35581	2023351	0	72	4889264	4186917	424213	15637661	1618252
SL	26883332	33158	2088970	0	26	4861485	4419210	395095	15085388	1693352
Tips: The independent sRNA libraries were generated with total RNA extracts from three biological replicates of each treatment.

## Sheet: TABLE S2
TABLE S2. Comparison of miRBase
BMK ID	Mature number	Hairpin number	Famlily number	Unique number	Total number
WC	42	38	19	608	83715
WL	42	38	20	455	27919
SC	42	40	21	426	34582
SL	46	42	21	518	53105

## Sheet: TABLE S3
TABLE S3. Promoter cis-acting elements analysis of DCL1-cleaved miRNAs target genes
Biological function	Cis-acting elements	Specific function	SlARF10	SlNAC	SlGRAS
			(miR160)	(miR164)	(miR171a)
Hormone regulation	CGTCA-motif	cis-acting regulatory element involved in the	√	√	√
		MeJA-responsiveness
	ABRE	cis-acting element involved in the abscisic acid responsiveness	√	√	√
	TATC-box	cis-acting element involved in gibberellin responsiveness		√
	TGA-element	auxin-responsive element	√	√	√
	TCA-element	cis-acting element involved in salicylic acid responsiveness		√
	TGACG-motif	cis-acting regulatory element involved in the MeJA-responsiveness	√	√	√
	GARE-motif	gibberellin-responsive element		√	√
	ERE	ethylene-responsive element		√	√
	P-box	gibberellin-responsive element	√
Stress response	HSE	cis-acting element involved in heat stress responsiveness	√	√
	LTR	cis-acting element involved in low-temperature responsiveness	√	√
	MBS	MYB binding site involved in drought -inducibility	√	√
	TC-rich repeats	cis-acting element involved in defense and stress responsiveness	√	√	√

## Sheet: TABLE S4
TABLE S4. All primers used for quantitative RT-PCR
Primer name	Forward primer (5'-3')
miR156-F	CGTGCTTGACAGAAGATAGA
miR156-R	TCCCGACCACCACAGCC
miR159-F	CGTGCGTTTGGATTGAAGG
miR159-R	TCCCGACCACCACAGCC
miR160-F	CTGTGGCGTATGAGGAGCCA
miR160-R	GGCTGTCGTGGACTGCG
miR162-F	CGCAGCGTCGATAAACCTCT
miR162-R	TCCGCAGCACCTCAGCC
miR166-F	CTGTGTCGGACCAGGCTTC
miR166-R	GGCTGTCGTGGACTGCG
miR1919-F	CGTGCACGAGAGTCATCTGT
miR1919-R	TCCCGACCACCACAGCC
miR5300-F	CGTGCTCCCCAGTCCAGGCAT
miR5300-R	TCCCGACCACCACAGCC
novel-m0005-F	CTGTGATTGAGTGCAGCGTT
novel-m0005-R	GGCTGTCGTGGACTGCG
novel-m0088-F	CTGTGTCTTTCCTACTCCTCC
novel-m0088-R	GGCTGTCGTGGACTGCG
pRI-miR162 -F	ATTGATCCGTTCCCTGG
pRI-miR162 -R	CAGGAAACAGCTATGAC
pRNAi-miR162 -F	AGAGGTTTATCGACCGA
pRNAi-miR162 -R	CAGGAAACAGCTATGAC
Kana-F	CAGCGATCGCGTATTTCGT
Kana-R	CAACCAAACCGTTATTCATTCG
Kana-Probe	FAM-TCGCTCAGGCGCAAT-BHQ1
DCL1-F	ATTCTGAGGGGTGATTGGATTT
DCL1-R	CGCCTTTGTTACTACAGTTCGA
NCED1-F	AGGCAACAGTGAAACTTCCATCAAG
NCED1-R	TCCATTAAAGAGGATATTACCGGGGAC
ZEP1-F	TCGGACTTGGTCCACTATCA
ZEP1-R	TAACATCAGAGGCATTCCCA
ABA2-F	ACTTGCCTCCTGAACAAAGG
ABA2-R	CTTAGCAACATCCTGAGCCA
AAO-F	GTGAGTTTGGTTTTGGCAGTT
AAO-R	GCATGGAAACCGGCAAACCT
CYP707A1-F	ATCACAACCCAGAGTTCTTTCCT
CYP707A1-R	CAGATCCTACCACTTCCCACC
CYP707A2-F	AGTACAGGTGGTCTATGGTGGG
CYP707A2-R	GTTGATGATGTTTTGAGAGAGAGTTT
ABI3-F	TTGATACGAGGGGTAAAAGTGAG
ABI3-R	AACAGCTTGTGCAAATGGAGAT
ABF4-F	GAAGAGTCTCAAGCGTTGT
ABF4-R	TGATCCTCCAGTCCCAC
MYB1-F	GAATTTTCCATCATTGAGGGTTT
MYB1-R	TCACTTGAGTAGTTTCCAGGGTT
AREB-F	TCCAGCACTCAACTCT
AREB-R	TGGCTCCTAAACCTAC
CBF1-F	GAGTCGGAAGAAGTTTCAGG
CBF1-R	TGTAGGCATCAGTTTCCAC
CBF2-F	TTCGATCGGAAGAAGTTTCA
CBF2-R	CAAGTAATCCTGGCATGGAA
CBF3-F	TGCCGGGTTTACTTACGAAT
CBF3-R	TCAGCTTCCACATGATCTCC
miR162-F	CGCAGCGTCGATAAACCTCT
miR162-R	TCCGCAGCACCTCAGCC
miR160-F	CTGTGGCGTATGAGGAGCCA
miR160-R	GGCTGTCGTGGACTGCG
SlARF10-F	CAGGTCCAGCAGTCCTTTCT
SlARF10-R	CGCTGGAAACTTGGTGGTAA
miR164-F	GATTGCTTCACCTATGGGGTC
miR164-R	CGTCTCAAGGCACATTAGGTC
SlNAC-F	CCACCATTGACAGATTCATCG
SlNAC-R	GGTGAACGAAGTCGGAAGAG
